# Supplementary material
Source: publisher figshare collection journal article supplement (https://acs.figshare.com/ndownloader/files/4551820)
Supplement: Supplementary file 1 [file 4551820]

**Supporting Information**  
**Inhibition of Subgenomic Hepatitis C Virus RNA Replication by Acridone**  
**Derivatives: Identification of an NS3 Helicase Inhibitor**

Giuseppe Manfroni,<sup>§</sup> Jan Paeshuyse,<sup>¥</sup> Serena Massari,<sup>§</sup> Samantha Zanolini,<sup>#</sup> Barbara Gatto,<sup>⊥</sup>  
Giovanni Maga,<sup>#</sup> Oriana Tabarrini,<sup>§,\*</sup> Violetta Cecchetti,<sup>§</sup> Arnaldo Fravolini,<sup>§</sup> and Johan Neyts.<sup>¥,\*</sup>

<sup>§</sup> Dipartimento di Chimica e Tecnologia del Farmaco, Università degli Studi di Perugia, Via del  
Liceo, 1, 06123 Perugia, Italy,

<sup>¥</sup> Rega Institute for Medical Research, Katholieke Universiteit Leuven, B-3000 Leuven, Belgium,

<sup>#</sup> Istituto di Genetica Molecolare, CNR-Pavia, Via Abbiategrasso, 207, 27100 Pavia, Italy and

<sup>⊥</sup> Dipartimento di Scienze Farmaceutiche, Università di Padova, Via Marzolo 5, 35131, Padova,  
Italy.

**Table of contents**

|                                                                                                                                                                                                                                 |       |
|---------------------------------------------------------------------------------------------------------------------------------------------------------------------------------------------------------------------------------|-------|
| Experimental details corresponding to the synthesis and analytical data of intermediates <b>49, 52-54, 56-59, 62-64, 66, 67, 71-73</b> and target compounds <b>7, 8, 10, 11, 13-15, 20-25, 28, 29, 31, 32, 41</b> and <b>42</b> | S2-S7 |
| Biological Protocols: HCV NS5B Assay                                                                                                                                                                                            | S7    |
| References                                                                                                                                                                                                                      | S7    |
| Elemental Analysis data for target compounds <b>7-35</b> and <b>39-47</b>                                                                                                                                                       | S8    |

**Experimental details corresponding to the synthesis and analytical data of intermediates 49, 52-54, 56-59, 62-64, 66, 67, 71-73 and target compounds 7, 8, 10, 11, 13-15, 20-25, 28, 29, 31, 32, 41 and 42 and target compounds 7, 8, 10, 11, 13-15, 20-25, 28, 29, 31, 32, 41 and 42.**

**4-Chloro-2-[(3-methoxyphenyl)amino]-5-nitrobenzoic acid (49).** Following the Ullman procedure of **50** and replacing the 3,4-dimethoxyaniline with 3-methoxyaniline, the title compound was obtained in 65% yield: mp 246-247 °C; <sup>1</sup>H NMR (DMSO-*d*<sub>6</sub>) δ 3.75 (s, 3H, OCH<sub>3</sub>), 6.80-6.90 (m, 3H, aromatic CH), 7.10 (s, 1H, H-3), 7.40 (t, *J* = 8.3 Hz, 1H, H-5'), 8.75 (s, 1H, H-6), 10.70 (bs, 1H, NH), 14.01 (bs, 1H, COOH).

**4-Chloro-2-[(3,5-dimethylphenyl)amino]-5-nitrobenzoic acid (52).** Following the Ullman procedure of **50** and replacing the 3,4-dimethoxyaniline with 2,3-dimethylaniline, the title compound was obtained in 51% yield: mp 290-292 °C; <sup>1</sup>H NMR (DMSO-*d*<sub>6</sub>) δ 2.30 (bs, 6H, CH<sub>3</sub>), 6.80-7.00 (m, 4H, H-2', H-4', H-6' and H-3), 8.60 (s, 1H, H-6), 10.20 (s, 1H, NH), 14.00 (bs, 1H, COOH).

**3-Chloro-2-nitro-9(10*H*)-acridinone (56).** Following the cyclization procedure of **55** and starting from **51**,<sup>1</sup> the title compound was prepared in 65% yield: mp > 300 °C; <sup>1</sup>H NMR (DMSO-*d*<sub>6</sub>) δ 7.30 (t, *J* = 7.4 Hz, 1H, H-7), 7.63 (d, *J* = 7.9 Hz, 1H, H-5), 7.75 (s, 1H, H-4), 7.80-7.90 (m, 1H, H-6), 8.25 (d, *J* = 6.9, 1H, H-8), 8.80 (s, 1H, H-1), 12.5 (bs, 1H, NH).

**6-Chloro-1,3-dimethyl-7-nitro-9(10*H*)-acridinone (57).** Following the cyclization procedure of **55** and starting from **52**, the title compound was prepared in 30% yield: mp 298-300 °C; <sup>1</sup>H NMR (DMSO-*d*<sub>6</sub>) δ 2.20 and 2.60 (s, each 3H, CH<sub>3</sub>), 6.70 e 6.90 (bs, each 1H, H-2 and H-4), 7.30 (s, 1H, H-5), 8.50 (s, 1H, H-8), 11.70 (bs, 1H, NH), 13,80.

**3-Chloro-6-methoxy-10-methyl-2-nitro-9(10*H*)-acridinone (58) and 6-chloro-1-methoxy-10-methyl-7-nitro-9(10*H*)-acridinone (59).** Following the cyclization procedure of **55** and starting from **49**, two isomers **3-chloro-6-methoxy-2-nitro-9(10*H*)-acridinone (53)** and **6-chloro-1-methoxy-7-nitro-9(10*H*)-acridinone (54)**, were obtained in 70% yield, and used as a crude mixture in the next step. Following the general procedure of N-alkylation of **60**, starting from the mixture of **53** and **54**, compounds **58** and **59** were obtained after column chromatography purification eluting with a gradient of CH<sub>2</sub>Cl<sub>2</sub>/MeOH (100:0 to 98:2). Compound **58** was obtained in 38% yield followed by compound **59** obtained in 42% yield.

Compound **58**: mp > 300 °C; <sup>1</sup>H NMR (DMSO-*d*<sub>6</sub>) δ 3.80 (s, 3H, NCH<sub>3</sub>), 3.90 (s, 3H, OCH<sub>3</sub>), 7.05 (dd, *J* = 2.05 and 8.80 Hz, 1H, H-7), 7.20 (d, *J* = 2.0 Hz, 1H, H-5), 8.10 (s, 1H, H-4), 8.20 (d, *J* = 8.80 Hz, 1H, H-8), 8.80 (s, 1H, H-1).

Compound **59**: mp > 300 °C; <sup>1</sup>H NMR (DMSO-*d*<sub>6</sub>) δ 3.80 (s, 3H, NCH<sub>3</sub>), 3.90 (s, 3H, OCH<sub>3</sub>), 6.80 (d, *J* = 8.3 Hz, H-2), 7.25 (d, *J* = 8.5 Hz, H-4), 7.65 (t, *J* = 8.9 Hz, H-3), 8.10 (s, 1H, H-5), 8.80 (s, 1H, H-8).

**6-Chloro-1,3,10-trimethyl-7-nitro-9(10*H*)-acridinone (62).** Following the general procedure of N-alkylation of **60** and starting from **57**, the title compound was obtained in 75% yield: mp >300 °C; <sup>1</sup>H NMR (DMSO-*d*<sub>6</sub>/TFA) δ 2.25 e 2.50 (s, each 3H, CH<sub>3</sub>), 3.65 (s, 3H, NCH<sub>3</sub>), 6.75-6.80 (m, 2H, H-2 and H-4), 7.35 (s, 1H, H-5), 8.60 (s, 1H, H-8).

**6-Methoxy-10-methyl-2-nitro-3-[4-(2-pyridinyl)-1-piperazinyl]-9(10*H*)-acridinone (63).** Following the general procedure for coupling reaction of **65** and starting from **58**, the title compound was obtained in 60% yield: mp > 300 °C; <sup>1</sup>H NMR (DMSO-*d*<sub>6</sub>) δ 3.25-3.35 and 3.60-3.70 (m, each 4H, piperazine CH<sub>2</sub>), 3.80 (s, 3H, NCH<sub>3</sub>), 3.90 (s, 3H, OCH<sub>3</sub>), 6.60-6.70 (m, 1H,

pyridine CH), 6.65-6.75 (m, 2H, H-5, and H-7), 7.10-7.20 (m, 2H, H-4, and pyridine CH), 7.50-7.60 (m, 1H, pyridine CH), 8.10-8.20 (m, 2H, H-8, and pyridine CH), 8.75 (s, 1H, H-1).

**1-Methoxy-10-methyl-7-nitro-6-[4-(2-pyridinyl)-1-piperazinyl]-9(10H)-acridinone (64).**

Following the general procedure for coupling reaction of **65** and starting from **59**, the title compound was obtained in 36% yield: mp > 300 °C; <sup>1</sup>H NMR (DMSO-*d*<sub>6</sub>) δ 3.00-3.30 and 3.60-3.75 (m, each 4H, piperazine CH<sub>2</sub>), 3.80 (s, 3H, NCH<sub>3</sub>), 3.90 (s, 3H, OCH<sub>3</sub>), 6.60-6.70 (m, 2H, H-3 and pyridine CH), 6.85 (d, *J* = 8.6 Hz, 1H, H-4), 7.10 (s, 1H, H-5), 7.20 (d, *J* = 8.6 Hz, 1H, H-2), 7.60-7.70 (m, 2H, pyridine CH), 8.10-8.20 (m, 1H, pyridine CH), 8.75 (s, 1H, H-8).

**10-Methyl-2-nitro-3-[4-(2-pyridinyl)-1-piperazinyl]-9(10H)-acridinone (66).** Following the general procedure for coupling reaction of **65** and starting from **61**, the title compound was obtained in 60% yield: mp 215-216 °C; <sup>1</sup>H NMR (DMSO-*d*<sub>6</sub>) δ 3.40-3.60 and 3.70-3.90 (m, each 4H, piperazine CH<sub>2</sub>), 4.00 (s, 3H, NCH<sub>3</sub>), 6.85 (t, *J* = 6.9 Hz, 1H, pyridine CH), 7.10 (d, *J* = 8.7 Hz, 1H, pyridine CH), 7.15 (s, 1H, H-4), 7.45 (ddd, *J* = 5.5, 7.6 and 9.4 Hz, 1H, H-7), 7.75 (t, *J* = 8.3 and 0.5 Hz, 1H, pyridine CH), 7.85-7.90 (m, 2H, H-5 and H-6), 8.20 (dd, *J* = 1.4 and 5.0 Hz, 1H, pyridine CH), 8.35 (d, *J* = 7.7 Hz, 1H, H-8), 8.80 (s, 1H, H-1).

**1,3,10-trimethyl-7-nitro-6-[4-(2-pyridinyl)-1-piperazinyl]-9(10H)-acridinone (67).** Following the general procedure for coupling reaction of **65** and starting from **62**, the title compound was obtained in 80% yield: mp 250-251 °C; <sup>1</sup>H NMR (DMSO-*d*<sub>6</sub>) δ 2.30 and 2.80 (s, each 3H, CH<sub>3</sub>), 3.30-3.45 and 3.60-3.75 (m, each 4H, piperazine CH<sub>2</sub>), 3.75 (s, 3H, NCH<sub>3</sub>), 6.60-6.75 (m, 1H, pyridine CH), 6.80-7.10 (m, 3H, H-2, H-4 and pyridine CH), 7.40 (s, 1H, H-5), 7.50-7.70 (m, 1H, pyridine CH), 8.10-8.25 (m, 1H, pyridine CH), 8.70 (s, 1H, H-8).

**2-Amino-6-methoxy-10-methyl-3-[4-(2-pyridinyl)-1-piperazinyl]-9(10H)-acridinone (7).**

Following the reduction procedure of **9** and starting from **63**, the title compound was obtained after crystallization by EtOH/DMF, in 36% yield as yellow solid: mp 266-267 °C; <sup>1</sup>H NMR (DMSO-*d*<sub>6</sub>) δ 3.10-3.20 (m, 4H, piperazine CH<sub>2</sub>), 3.70-3.75 (m, 7H, NCH<sub>3</sub>, and piperazine CH<sub>2</sub>), 3.95 (s, 3H, OCH<sub>3</sub>), 6.60-6.85 (m, 4H, H-5, H-7, and pyridine CH), 7.00 (s, 1H, H-4), 7.50-7.60 (m, 1H, pyridine CH), 7.85 (s, 1H, H-1), 8.35 (m, 1H, pyridine CH). Anal. (C<sub>24</sub>H<sub>25</sub>N<sub>5</sub>O<sub>2</sub>) C, H, N.

**7-Amino-1-methoxy-10-methyl-6-[4-(2-pyridinyl)-1-piperazinyl]-9(10H)-acridinone (8).**

Following the reduction procedure of **9** and starting from **64**, the title compound was obtained after purification by flash chromatography (CHCl<sub>3</sub>/MeOH, 97:3), in 23% yield as yellow solid: mp > 300 °C; <sup>1</sup>H NMR (DMSO-*d*<sub>6</sub>) δ 3.00-3.15 and 3.60-3.75 (m, each 4H, piperazine CH<sub>2</sub>), 3.80 (s, 3H, NCH<sub>3</sub>), 3.90 (s, 3H, OCH<sub>3</sub>), 5.00 (bs, 2H, NH<sub>2</sub>), 6.60-6.75 (m, 2H, H-2 and pyridine CH), 6.85 (d, *J* = 8.6 Hz, 1H, pyridine CH), 7.15 (s, 1H, H-5), 7.20 (d, *J* = 8.7 Hz, 1H, H-4), 7.50-7.60 (m, 3H, H-3, H-8, and pyridine CH), 8.15 (m, 1H, pyridine CH). Anal. (C<sub>24</sub>H<sub>25</sub>N<sub>5</sub>O<sub>2</sub>) C, H, N.

**2-Amino-10-methyl-3-[4-(2-pyridinyl)-1-piperazinyl]-9(10H)-acridinone (10).**

Following the reduction procedure of **9** and starting from **66**, the title compound was obtained after purification by flash chromatography (CHCl<sub>3</sub>/MeOH, 97:3), in 25% yield as yellow solid: mp > 300 °C; <sup>1</sup>H NMR (DMSO-*d*<sub>6</sub>) δ 3.10-3.30 and 3.60-3.80 (m, each 4H, piperazine CH<sub>2</sub>), 3.90 (s, 3H, NCH<sub>3</sub>), 5.00 (bs, 2H, NH<sub>2</sub>), 6.60-6.70 (m, 1H, pyridine CH), 6.85-6.95 (m, 1H, pyridine CH), 7.20-7.25 (m, 2H, H-4 and H-7), 7.50-7.70 (m, 2H, H-1 and H-6), 7.70-7.75 (m, 2H, H-5 and pyridine CH), 8.15 (dd, *J* = 1.9 and 5.0 Hz, 1H, pyridine CH), 8.25 (dd, *J* = 2.1 and 9.9 Hz, 1H, H-8). Anal. (C<sub>23</sub>H<sub>23</sub>N<sub>5</sub>O) C, H, N.

**7-Amino-1,3,10-trimethyl-6-[4-(2-pyridinyl)-1-piperazinyl]-9(10H)-acridinone (11).** Following the reduction procedure of **9** and starting from **67**, the title compound was obtained after

purification by flash chromatography (CHCl<sub>3</sub>/MeOH, 97:3) followed by crystallization with EtOH, in 24% yield as yellow solid: mp 218-220 °C; <sup>1</sup>H NMR (DMSO-*d*<sub>6</sub>) δ 2.40 and 2.80 (s, each 3H, CH<sub>3</sub>), 3.00-3.54 and 3.62-3.75 (m, each 4H, piperazine CH<sub>2</sub>), 3.80 (s, 3H, NCH<sub>3</sub>), 4.87 (bs, 2H, NH<sub>2</sub>), 6.62-6.73 (m, 1H, pyridine CH), 6.79 (s, 1H, H-2), 6.87 (d, *J* = 8.4 Hz, 1H, pyridine CH), 7.10 (s, 1H, H-4), 7.35 (s, 1H, H-5), 7.45-7.65 (m, 2H, pyridine CH and H-8), 8.10-8.20 (m, 1H, pyridine CH). Anal. (C<sub>25</sub>H<sub>27</sub>N<sub>5</sub>O) C, H, N.

**3-Methoxy-10-methyl-7-nitro-1-propoxy-6-[4-(2-pyridinyl)-1-piperazinyl]-9(10*H*)-acridinone (71).** Following the general procedure for *O*-alkylation of compound **70** and replacing the 1-iodoethane with 1-iodopropane, the title compound was obtained in 91% yield: mp 284-285 °C; <sup>1</sup>H NMR (DMSO *d*<sub>6</sub>) δ 1.12 (t, *J* = 7.13 Hz, 3H, OCH<sub>2</sub>CH<sub>2</sub>CH<sub>3</sub>), 1.78 (q, *J* = 7.1 Hz, 2H, OCH<sub>2</sub>CH<sub>2</sub>CH<sub>3</sub>), 3.25-3.40 and 3.70-3.76 (m, each 4H, piperazine CH<sub>2</sub>), 3.80 and 3.90 (s, each 3H, NCH<sub>3</sub> and OCH<sub>3</sub>), 4.02 (t, *J* = 7.1 Hz, 2H, OCH<sub>2</sub>CH<sub>2</sub>CH<sub>3</sub>), 6.45 and 6.60 (d, *J* = 2.0 Hz, each 1H, H-2 and H-4), 6.70 (dd, *J* = 2.0 and 7.0 Hz, 1H, pyridine CH), 6.90 (d, *J* = 8.6 Hz, 1H, pyridine CH), 7.00 (s, 1H, H-5), 7.63 (ddd, *J* = 1.8, 7.0 and 8.9 Hz, 1H, pyridine CH), 8.18 (dd, *J* = 1.4 and 4.8 Hz, 1H, pyridine CH), 8.60 (s, 1H, H-8).

**1-Isobutoxy-3-methoxy-10-methyl-7-nitro-6-[4-(2-pyridinyl)-1-piperazinyl]-9(10*H*)-acridinone (72).** Following the general procedure for *O*-alkylation of compound **70** and replacing the 1-iodoethane with 2-methyl-1-iodopropane, the title compound was obtained after flash chromatography purification (CHCl<sub>3</sub> /MeOH, 99:1), in 45% yield: mp 294-296 °C ; <sup>1</sup>H NMR (CDCl<sub>3</sub>) δ 1.08 (d, *J* = 6.7 Hz, 6H, OCH<sub>2</sub>CH(CH<sub>3</sub>)<sub>2</sub>), 2.10-2.31 (m, 1H, OCH<sub>2</sub>CH(CH<sub>3</sub>)<sub>2</sub>), 3.15-3.27 (m, 4H, piperazine CH<sub>2</sub>), 3.60-3.79 (m, 9H, NCH<sub>3</sub>, piperazine CH<sub>2</sub> and OCH<sub>2</sub>CH(CH<sub>3</sub>)<sub>2</sub>), 3.85 (s, 1H, OCH<sub>3</sub>), 6.18 and 6.23 (d, *J* = 2.11 Hz, each 1H, H-2 and H-4), 6.53-6.69 (m, 3H, H-5 and pyridine CH), 7.44 (dt, *J* = 2.0 and 9.0 Hz, 1H, pyridine CH), 8.14 (dd, *J* = 2.0 and 5.2 Hz, 1H, pyridine CH), 8.91 (s, 1H, H-8).

**({3-Methoxy-10-methyl-7-nitro-9-oxo-6-[4-(2-pyridinyl)-1-piperazinyl]-9,10-dihydro-1-acridinyl}oxy)acetic acid (73).** Following the general procedure for *O*-alkylation of compound **70** and replacing the 1-iodoethane with ethyl α-bromoacetate, the title compound was obtained after crystallization by EtOH/DMF (2:1) in 39% yield: mp 252-253°C; <sup>1</sup>H NMR (DMSO-*d*<sub>6</sub>) δ 3.10-3.40 and 3.65-3.70 (m, each 4H, piperazine CH<sub>2</sub>), 3.75 (s, 3H, OCH<sub>3</sub>), 3.90 (s, 3H, NCH<sub>3</sub>), 4.90 (s, 2H, OCH<sub>2</sub>), 6.40 (d, *J* = 2.0 Hz, 1H, H-2), 6.60-6.75 (m, 2H, H-4 and pyridine CH), 6.85-7.00 (m, 2H, H-5 and pyridine CH), 7.50-7.65 (m, 1H, pyridine CH), 8.10-8.20 (dd, *J* = 1.6 and 4.9 Hz, 1H, pyridine CH), 8.60 (s, 1H, H-8).

**7-Amino-3-methoxy-10-methyl-1-propoxy-6-[4-(2-pyridinyl)-1-piperazinyl]-9(10*H*)-acridinone (13).** Following the reduction procedure of **12** and starting from **71**, the title compound was obtained after crystallized by EtOH/DMF, in 55% yield as yellow solid: mp 264-265 °C; <sup>1</sup>H NMR (DMSO-*d*<sub>6</sub>) δ 1.10 (t, *J* = 7.2 Hz, 3H, CH<sub>2</sub>CH<sub>3</sub>), 1.70-1.80 (m, 2H, CH<sub>2</sub>CH<sub>3</sub>), 3.00-3.25 (m, 4H, piperazine CH<sub>2</sub>), 3.70-3.80 (m, 7H, piperazine CH<sub>2</sub> and NCH<sub>3</sub>), 3.82-4.00 (m, 5H, OCH<sub>3</sub> and OCH<sub>2</sub>), 4.80 (bs, 2H, NH<sub>2</sub>), 6.25 and 6.55 (d, *J* = 1.60 Hz, each 1H, H-2 and H-4), 6.65 (dd, *J* = 1.9 and 7.0 Hz, 1H, pyridine CH), 6.90 (d, *J* = 8.5 Hz, 1H, pyridine CH), 7.05 (s, 1H, H-5), 7.50-7.65 (m, 2H, H-8 and pyridine CH), 8.20-8.35 (m, 1H, pyridine CH). Anal. (C<sub>27</sub>H<sub>31</sub>N<sub>5</sub>O<sub>3</sub>) C, H, N.

**7-Amino-1-isobutoxy-3-methoxy-10-methyl-6-[4-(2-pyridinyl)-1-piperazinyl]-9(10*H*)-acridinone (14).** Following the reduction procedure of **12** and starting from **72**, the title compound was obtained after crystallization by EtOH/DMF, in 32% yield as yellow solid: mp 245-247 °C; <sup>1</sup>H NMR (CDCl<sub>3</sub>) δ 1.17 (d, *J* = 6.7 Hz, 6H, CH(CH<sub>3</sub>)<sub>2</sub>), 2.22-2.40 (m, 1H, CH(CH<sub>3</sub>)<sub>2</sub>), 3.17-3.23 (m, 4H, piperazine CH<sub>2</sub>), 3.70-3.79 (m, 7H, piperazine CH<sub>2</sub> and NCH<sub>3</sub>), 3.84 (d, *J* = 6.8 Hz, 2H, OCH<sub>2</sub>),

3.93 (s, 3H, OCH<sub>3</sub>), 6.24 and 6.35 (d,  $J = 2.1$  Hz, each 1H, H-2 e H-4), 6.65-6.78 (m, 2H, pyridine CH), 6.93 (s, 1H, H-5), 7.55 (ddd,  $J = 2.0, 6.9$  and  $8.9$  Hz, 1H, pyridine CH), 7.86 (s, 1H, H-8), 8.24 (dd,  $J = 1.2$  and  $4.9$  Hz, 1H, pyridine CH). Anal. (C<sub>28</sub>H<sub>33</sub>N<sub>5</sub>O<sub>3</sub>) C, H, N.

**({7-Amino-3-methoxy-10-methyl-9-oxo-6-[4-(2-pyridinyl)-1-piperazinyl]-9,10-dihydro-1-acridinyl}oxy)acetic acid (15).** Following the reduction procedure of **12** and starting from **73**, the title compopund was obtained after purification by reverse flash chromatography (dioxane/H<sub>2</sub>O, 99:1), in 17% yield as yellow solid: mp > 300 °C; <sup>1</sup>H NMR (DMSO-*d*<sub>6</sub>) δ 3.00-3.25 and 3.60-3.80 (m, each 4H, piperazine CH<sub>2</sub>), 3.90 and 4.00 (s, each 3H, NCH<sub>3</sub> and OCH<sub>3</sub>), 4.80 (s, 2H, OCH<sub>2</sub>), 5.20 (bs, 2H, NH<sub>2</sub>) 6.50 (bs, 1H, H-2), 6.55-6.80 (m, 2H, H-4 and pyridine CH), 6.90 (d,  $J = 7.8$  Hz, 1H, pyridine CH), 7.20 (s, 1H, H-5), 7.50-7.70 (m, 2H, pyridine CH and H-8), 8.10-8.25 (m, 1H, pyridine CH). Anal. (C<sub>26</sub>H<sub>27</sub>N<sub>5</sub>O<sub>5</sub>) C, H, N.

**7-Amino-1,3-dimethoxy-10-methyl-6-[4-(2-pyrimidinyl)-1-piperazinyl]-9(10H)-acridinone (20).** Following the same procedure as that used for the synthesis of **19** and replacing 1-(4-pyridinyl)piperazine with 2-(1-piperazinyl)pyrimidine, the title compound was obtained after purification by flash chromatography (CHCl<sub>3</sub>/MeOH, 93:7), in 21% overall yield as a yellow solid: mp > 300 °C; <sup>1</sup>H NMR (DMSO-*d*<sub>6</sub>) δ 3.00-3.10 and 3.95-4.00 (m, each 4H, piperazine CH<sub>2</sub>), 3.75 (s, 3H, NCH<sub>3</sub>), 3.80 and 3.90 (s, each 3H, OCH<sub>3</sub>), 4.75 (bs, 2H, NH<sub>2</sub>), 6.26 and 6.55 (d,  $J = 1.8$  Hz, each 1H, H-2 and H-4), 6.65 (t,  $J = 4.7$  Hz, 1H, pyrimidine CH), 7.05 (s, 1H, H-5), 7.50 (s, 1H, H-8), 8.30-8.35 (m, 2H, pyrimidine CH). Anal. (C<sub>24</sub>H<sub>26</sub>N<sub>6</sub>O<sub>3</sub>) C, H, N.

**7-Amino-1,3-dimethoxy-10-methyl-6-{4-[5-(trifluoromethyl)-2-pyridinyl]-1-piperazinyl}-9(10H)-acridinone (21).** Following the same procedure as that used for the synthesis of **19** and replacing 1-(4-pyridinyl)piperazine with 1-[5-(trifluoromethyl)-2-pyridinyl]piperazine the title compound was obtained after purification by flash chromatography (CHCl<sub>3</sub>/MeOH, 95:5), in 20% overall yield as a yellow solid: mp > 300 °C; <sup>1</sup>H NMR (DMSO-*d*<sub>6</sub>) δ 3.00-3.15 (m, 4H, piperazine CH<sub>2</sub>), 3.75 (s, 3H, NCH<sub>3</sub>), 3.80 (s, 3H, OCH<sub>3</sub>), 3.90-4.00 (m, 7H, piperazine CH<sub>2</sub> and OCH<sub>3</sub>), 4.90 (bs, 2H, NH<sub>2</sub>), 6.25 and 6.55 (d,  $J = 2.0$  Hz, each 1H, H-2 and H-4), 7.00-7.10 (m, 2H, pyridine CH, and H-5), 7.50 (s, 1H, H-8), 7.80 (dd,  $J = 2.5$  and  $9.2$  Hz, 1H, pyridine CH), 8.45 (d,  $J = 0.9$  Hz, 1H, pyridine CH). Anal. (C<sub>26</sub>H<sub>26</sub>F<sub>3</sub>N<sub>5</sub>O<sub>3</sub>) C, H, N.

**7-Amino-1,3-dimethoxy-10-methyl-6-(4-phenyl-1-piperazinyl)-9(10H)-acridinone (22).** Following the same procedure as that used for the synthesis of **19** and replacing 1-(4-pyridinyl)piperazine with 1-phenylpiperazine, the title compound was obtained after purification by flash chromatography (CHCl<sub>3</sub>/MeOH, 97:3), in 39% overall yield as a yellow solid: mp 275-276 °C; <sup>1</sup>H NMR (DMSO-*d*<sub>6</sub>) δ 3.10-3.20 and 3.30-3.40 (m, each 4H, piperazine CH<sub>2</sub>), 3.75 (s, 3H, NCH<sub>3</sub>), 3.80 and 3.90 (s, each 3H, OCH<sub>3</sub>), 4.80 (s, 2H, NH<sub>2</sub>), 6.25 and 6.55 (d,  $J = 2.0$  Hz, each 1H, H-2 and H-4), 6.70-6.85 (m, 1H, aromatic CH), 6.90-7.10 (m, 3H, aromatic CH and H-5), 7.15-7.28 (m, 2H, aromatic CH), 7.40 (s, 1H, H-8). Anal. (C<sub>26</sub>H<sub>28</sub>N<sub>4</sub>O<sub>3</sub>) C, H, N.

**7-Amino-1,3-dimethoxy-10-methyl-6-[4-(1,3-thiazol-2-yl)-1-piperazinyl]-9(10H)-acridinone (23).** Following the same procedure as that used for the synthesis of **19** and replacing 1-(4-pyridinyl)piperazine with 1-(1,3-thiazol-2-yl)piperazine, the title compound was obtained after purification by flash chromatography (CHCl<sub>3</sub>/MeOH, 93:7), in 35% overall yield as a yellow solid: mp > 300 °C; <sup>1</sup>H NMR (CDCl<sub>3</sub>) δ 3.20-3.30 (m, 4H, piperazine CH<sub>2</sub>), 3.60-3.70 (m, 7H, piperazine CH<sub>2</sub> and NCH<sub>3</sub>), 3.80 and 3.90 (s, each 3H, OCH<sub>3</sub>), 6.25 and 6.35 (d,  $J = 2.1$  Hz, each 1H, H-2 and H-4), 6.60 (d,  $J = 3.7$  Hz, 1H, thiazole CH), 6.80 (s, 1H, H-5), 7.25 (d,  $J = 3.7$  Hz, 1H, thiazole CH), 7.80 (s, 1H, H-8). Anal. (C<sub>23</sub>H<sub>25</sub>N<sub>5</sub>O<sub>3</sub>S) C, H, N.

**7-Amino-6-[4-(1,3-benzoxazol-2-yl)-1-piperazinyl]-1,3-dimethoxy-10-methyl-9(10H)-acridinone (24).** Following the same procedure as that used for the synthesis of **19** and replacing 1-(4-pyridinyl)piperazine with 2-(1-piperazinyl)-1,3-benzoxazole,<sup>2</sup> the title compound was obtained after purification by flash chromatography (CHCl<sub>3</sub>/MeOH, 93:7), in 38% overall yield as a yellow solid: mp 284-286 °C; <sup>1</sup>H NMR (DMSO-*d*<sub>6</sub>) δ 3.00-3.25 (m, 4H, piperazine CH<sub>2</sub>), 3.65-3.80 (m, 7H, piperazine CH<sub>2</sub> and NCH<sub>3</sub>), 3.90 and 4.00 (s, each 3H, OCH<sub>3</sub>), 4.95 (bs, 2H, NH<sub>2</sub>), 6.25 and 6.50 (d, *J* = 2.0 Hz, each 1H, H-2 and H-4), 6.85-7.00 (m, 2H, H-5 and aromatic CH), 7.10 (t, *J* = 7.6 Hz, 1H, aromatic CH), 7.25 and 7.35 (d, *J* = 7.6 Hz, each 1H, aromatic CH), 7.50 (s, 1H, H-8). Anal. (C<sub>27</sub>H<sub>27</sub>N<sub>5</sub>O<sub>4</sub>) C, H, N.

**7-Amino-1,3-dimethoxy-6-[4-(2-methoxyphenyl)-1-piperazinyl]-10-methyl-9(10H)-acridinone (25).** Following the same procedure as that used for the synthesis of **19** and replacing 1-(4-pyridinyl)piperazine with 1-(2-methoxyphenyl)piperazine, the title compound was obtained after purification by flash chromatography (CHCl<sub>3</sub>/MeOH, 98:2), in 10% overall yield as a yellow solid: mp 271-272 °C; <sup>1</sup>H NMR δ (CDCl<sub>3</sub>) 3.27-3.35 (m, 8H, piperazine CH<sub>2</sub>), 3.78, 3.92 and 3.95 (s, each 3H, OCH<sub>3</sub>), 4.00 (s, 3H, NCH<sub>3</sub>), 6.26 and 6.32 (d, *J* = 2.1 Hz, each 1H, H-2 and H-4), 6.83-7.20 (m, 5H, H-5 and aromatic H), 7.78 (s, 1H, H-8). Anal. (C<sub>27</sub>H<sub>30</sub>N<sub>4</sub>O<sub>4</sub>) C, H, N.

**7-Amino-6-[4-(1,3-benzoxazol-2-yl)-1-piperazinyl]-1-hydroxy-3-methoxy-10-methyl-9(10H)-acridinone (28) and 7-amino-6-[4-(1,3-benzoxazol-2-yl)-1-piperazinyl]-1,3-dihydroxy-10-methyl-9(10H)-acridinone (31).** Following the de-*O*-methylation procedure of **27** and **30**, and starting from **24**, the title compounds were obtained after purification by flash chromatography (CHCl<sub>3</sub>/MeOH, 97:3). Compound **28** was obtained in 41% yield, followed by compound **31** in 14% yield.

Compound **28**: mp > 300 °C; <sup>1</sup>H NMR (DMSO-*d*<sub>6</sub>) δ 3.10-3.30 and 3.85-3.90 (m, each 4H, piperazine CH<sub>2</sub>), 3.80 and 4.05 (s, each 3H, NCH<sub>3</sub> and OCH<sub>3</sub>), 5.00 (bs, 2H, NH<sub>2</sub>), 6.30 and 6.60 (d, *J* = 2.0 Hz, each 1H, H-2 and H-4), 7.00-7.15 (m, 2H, aromatic CH and H-5), 7.20 (t, *J* = 6.2 Hz, 1H, aromatic CH), 7.35 and 7.45 (d, *J* = 7.2 Hz, each 1H, aromatic CH), 7.70 (s, 1H, H-8), 15.50 (s, 1H, OH). Anal. (C<sub>26</sub>H<sub>25</sub>N<sub>5</sub>O<sub>4</sub>) C, H, N.

Compound **31**: mp > 300 °C; <sup>1</sup>H NMR (DMSO-*d*<sub>6</sub>) δ 2.70-3.00 (m, each 4H, piperazine CH<sub>2</sub>), 3.50 (s, 3H, NCH<sub>3</sub>), 5.00 (bs, 2H, NH<sub>2</sub>), 6.00 and 6.40 (bs, each 1H, H-2 and H-4), 7.00-7.30 (m, 3H, H-5 and aromatic CH), 7.40 and 7.50 (d, *J* = 7.5 Hz, each 1H, aromatic CH), 7.55 (s, 1H, H-8), 10.50 and 15.00 (s, each 1H, OH). Anal. (C<sub>25</sub>H<sub>23</sub>N<sub>5</sub>O<sub>4</sub>) C, H, N.

**7-Amino-1-hydroxy-3,6-dimethoxy-10-methyl-9(10H)-acridinone (29) and 7-amino-1,3-dihydroxy-6-methoxy-10-methyl-9(10H)-acridinone (32).** Following the de-*O*-methylation procedure of **27** and **30**, and starting from **26**, the title compounds were obtained after purification by flash chromatography (CHCl<sub>3</sub>/MeOH, 95:5). Compound **29** was obtained in 37% yield, followed by compound **32** in 10% yield.

Compound **29**: mp 287-288 °C; <sup>1</sup>H NMR (DMSO-*d*<sub>6</sub>) δ 3.80 (s, 3H, NCH<sub>3</sub>), 3.90 and 4.00 (s, each 3H, OCH<sub>3</sub>), 5.00 (s, 2H, NH<sub>2</sub>), 6.00 and 6.50 (d, *J* = 2.1 Hz, each 1H, H-2 and H-4), 7.15 (s, 1H, H-5), 7.50 (s, 1H, H-8), 15.70 (s, 1H, OH). Anal. (C<sub>16</sub>H<sub>16</sub>N<sub>2</sub>O<sub>4</sub>) C, H, N.

The qualitative analysis of NOESY spectra showed three relevant NOE cross-peaks: 3-OCH<sub>3</sub>/H-2; 3-OCH<sub>3</sub>/H-4; 6-OCH<sub>3</sub>/H-5.

Compound **32**: mp > 300 °C (dec.); <sup>1</sup>H NMR (DMSO-*d*<sub>6</sub>) δ 3.35 and 4.00 (s, each 3H, NCH<sub>3</sub> and OCH<sub>3</sub>), 5.00 (bs, 2H, NH<sub>2</sub>), 5.90 and 6.35 (d, *J* = 1.9 Hz, each 1H, H-2 and H-4), 7.00 (s, 1H, H-5), 7.45 (s, 1H, H-8), 10.10 and 15.70 (s, each 1H, OH). Anal. (C<sub>15</sub>H<sub>14</sub>N<sub>2</sub>O<sub>4</sub>) C, H, N.

The qualitative analysis of NOESY spectra showed one relevant NOE cross-peak: 6-OCH<sub>3</sub>/H-5.

**7-Amino-6-chloro-1-hydroxy-3-methoxy-9(10H)-acridinone (41) and 7-Amino-6-chloro-1,3-dihydroxy-9(10H)-acridinone (42).** Following the de-*O*-methylation procedure of **27** and **30**, and

starting from **40**, the title compounds were obtained after purification by flash chromatography (CH<sub>2</sub>Cl<sub>2</sub>/EtOAc/MeOH, 98:2:0 to 97.5:2:0.5). Compound **41** was obtained in 27% yield followed by **42** in 10% yield.

Compound **41**: mp > 300 °C; <sup>1</sup>H NMR (DMSO-*d*<sub>6</sub>) δ 3.80 (s, 3H, OCH<sub>3</sub>), 5.50 (s, 2H, NH<sub>2</sub>), 6.05 and 6.25 (d, *J* = 2.2 Hz, each 1H, H-2 and H-4), 7.30 (s, 1H, H-5), 7.55 (s, 1H, H-8), 11.80 (bs, 1H, NH), 14.20 (bs, 1H, OH). Anal. (C<sub>14</sub>H<sub>11</sub>ClN<sub>2</sub>O<sub>3</sub>) C, H, N.

Compound **42**: mp > 300 °C; <sup>1</sup>H NMR (DMSO-*d*<sub>6</sub>) δ 5.50 (bs, 2H, NH<sub>2</sub>), 5.90 and 6.10 (bs, 2H, H-2 and H-4), 7.40 (s, 1H, H-5), 7.60 (s, 1H, H-8), 11.50 (bs, 2H, OH and NH), 14.20 (s, 1H, OH). Anal. (C<sub>13</sub>H<sub>9</sub>ClN<sub>2</sub>O<sub>3</sub>) C, H, N.

### Biological Protocols

**HCV NS5B Assays.** The cloned gene for HCV NS5B was kindly provided by Dr. Joachim Jaeger, Astbury Centre, RepliZyme Ltd, UK. Recombinant HCV NS5B was expressed in *E. coli* and purified by FPLC chromatography through DEAE and HyperD Heparin columns. Assays were performed as follows: NS5B (25-50 nM) was incubated in a final volume of 25 µl in the presence of 50 mM Tris-HCl pH8.0, 1 mM DTT, 0.25 mg/ml BSA, 2.5 µM (3'-OH ends) of the RNA/RNA homopolymeric template (rA)<sub>40</sub>/(rU)<sub>20</sub>, 0.25 mM MnCl<sub>2</sub> and 2 µM [<sup>3</sup>H]-UTP (37Ci/mmol). Samples were incubated 40 min at 25°C. 20 µl aliquots were spotted on DE-81 filters (Wathman) which were washed twice in 0.5 M K<sub>2</sub>HPO<sub>4</sub>, once in water and once in acetone. Bound radioactivity was detected by liquid scintillation counter (Microbeta Trilux, Perkin-Elmer).

### References

1. Cain, B. F.; Atwell, G. J. Potential Antitumor Agents. 20. Structure-Activity-Site Relationship for the 4'-(9-acridinylamino)alkanesulfonanilides. *J. Med. Chem.* **1976**, *19*, 1409-1416.
2. Kimura, T.; Katsube, T. Preparation of Aminoquinolone Derivatives as Anti-HIV Agents. EP 572259 A1. *Chem. Abstr.* 1994, 121, 57343.

**Elemental Analysis data for target compounds 7-35 and 39-47**

| <b>compd</b> | <b>calcd</b> |           |           | <b>found</b> |           |           |
|--------------|--------------|-----------|-----------|--------------|-----------|-----------|
|              | <b>C%</b>    | <b>H%</b> | <b>N%</b> | <b>C%</b>    | <b>H%</b> | <b>N%</b> |
| <b>7</b>     | 69.38        | 6.06      | 16.86     | 68.08        | 6.17      | 16.92     |
| <b>8</b>     | 69.38        | 6.06      | 16.86     | 69.28        | 5.85      | 16.66     |
| <b>9</b>     | 67.40        | 6.11      | 15.72     | 67.65        | 6.32      | 15.81     |
| <b>10</b>    | 71.67        | 6.01      | 18.17     | 71.38        | 6.05      | 18.10     |
| <b>11</b>    | 72.61        | 6.58      | 16.94     | 72.95        | 6.66      | 16.86     |
| <b>12</b>    | 67.95        | 6.36      | 15.24     | 67.91        | 6.30      | 14.91     |
| <b>13</b>    | 68.48        | 6.60      | 14.79     | 68.28        | 6.51      | 14.76     |
| <b>14</b>    | 68.97        | 6.82      | 14.36     | 68.69        | 6.76      | 14.16     |
| <b>15</b>    | 63.79        | 5.56      | 14.31     | 63.75        | 5.49      | 14.28     |
| <b>16</b>    | 66.81        | 5.84      | 16.23     | 67.09        | 6.02      | 16.28     |
| <b>17</b>    | 67.95        | 6.36      | 15.24     | 68.05        | 6.39      | 15.22     |
| <b>18</b>    | 69.44        | 7.03      | 13.96     | 69.38        | 6.98      | 13.89     |
| <b>19</b>    | 67.40        | 6.11      | 15.72     | 67.36        | 6.01      | 15.69     |
| <b>20</b>    | 64.56        | 5.87      | 18.82     | 64.51        | 5.81      | 18.79     |
| <b>21</b>    | 60.81        | 5.10      | 11.10     | 61.01        | 5.01      | 11.07     |
| <b>22</b>    | 70.25        | 6.35      | 12.60     | 70.23        | 6.31      | 12.56     |
| <b>23</b>    | 61.18        | 5.58      | 15.51     | 61.07        | 5.52      | 15.48     |
| <b>24</b>    | 66.79        | 5.61      | 14.42     | 66.59        | 5.59      | 14.40     |
| <b>25</b>    | 68.34        | 6.37      | 11.81     | 68.31        | 6.32      | 11.92     |
| <b>26</b>    | 64.96        | 5.77      | 8.91      | 65.03        | 5.71      | 8.88      |
| <b>27</b>    | 69.75        | 6.09      | 13.01     | 69.73        | 6.12      | 13.08     |
| <b>28</b>    | 66.23        | 5.34      | 14.85     | 66.41        | 5.39      | 14.89     |
| <b>29</b>    | 63.99        | 5.37      | 9.33      | 64.21        | 5.49      | 9.05      |
| <b>30</b>    | 69.21        | 5.81      | 13.45     | 69.18        | 5.78      | 13.39     |
| <b>31</b>    | 65.63        | 5.07      | 15.31     | 65.28        | 4.98      | 15.51     |
| <b>32</b>    | 62.93        | 4.93      | 9.79      | 63.12        | 5.21      | 9.59      |
| <b>33</b>    | 66.95        | 5.62      | 12.49     | 66.64        | 5.58      | 12.39     |
| <b>34</b>    | 68.48        | 6.60      | 14.79     | 68.38        | 6.53      | 14.69     |
| <b>35</b>    | 69.75        | 6.09      | 13.01     | 69.73        | 6.05      | 12.98     |
| <b>39</b>    | 64.08        | 6.18      | 7.47      | 64.05        | 6.10      | 7.39      |
| <b>40</b>    | 59.12        | 4.30      | 9.19      | 60.01        | 4.27      | 9.08      |
| <b>41</b>    | 57.84        | 3.81      | 9.64      | 57.65        | 4.03      | 9.55      |
| <b>42</b>    | 56.43        | 3.28      | 10.13     | 56.33        | 3.21      | 10.22     |
| <b>43</b>    | 64.78        | 6.31      | 15.11     | 64.65        | 6.28      | 15.15     |
| <b>44</b>    | 68.71        | 6.97      | 16.69     | 68.59        | 6.76      | 16.76     |
| <b>45</b>    | 68.88        | 6.26      | 13.39     | 68.93        | 6.34      | 13.35     |
| <b>46</b>    | 68.30        | 5.98      | 13.85     | 68.21        | 6.05      | 13.77     |
| <b>47</b>    | 68.77        | 6.20      | 14.85     | 68.87        | 6.18      | 15.01     |
